# Supplementary material
Source: PubMed Central journal article supplement (PMC2673882)
Supplement: JCI38499sd.pdf [file JCI38499sd.pdf]

**A**

HRE-5  
 -610 TTTTCCATCAGGCACCAAGTCCGGAGTTT**GCGTGG**CTCTGATGTCTGCTCGTGGATCACT  
 -550 GATTGACCAGGCTGAAGCCAGAGGGTCTTTAGATCCCAGGGATAATAGAGCAGGCAGC  
 -490 ATTTCCACC**CACGT**TCTGAGACTCCTCATAATTGCCTCAGTGCTG**CACGT**ACCTATATGG  
 -430 AAAATACAAGTGCACCTGTGAGGCTTGGGGTTAATGGTTTCACT**CACGT**CTCAGAGGAGC  
 -370 AGAGTCCTAGTGCACCTGTGGAGCCTGAACCAGCTGCACTCCAAGAGGAGCAGAGAAGGG  
 -310 AAGCAATTTCTTACTCCACCCCTTTCAACCACTGGCACTCACAGGCTTGCCACCTACTCT  
 -250 TGCTCCTGCCAAATGGTACAGAGATGAAATCTTAGAATAAAAATTTTGAACCTCAATAAAT  
 -190 TGTTAATTAATATCTAGGAGTGGCAGATATATAATGCTTCTCTTTTCACGACAGGTCAAA  
 -130 GATGAAATCTGATTAGGCTTTGGAGGG**GCGTGG**TTTGCTCTTGAAATTCCTTGCTCGTCT  
 -70 TTAGAAAGCTGTGTTGCTTAGAGCACCCAAAAGTGCCCTTTATCTAACTGAGGGAGGCGC  
 +1  
 -10 ACTTGTCTTCATATATAGAGGCAGGAGCTGGCATTGGGAAAAGTCAAACCTAGTTCTGCACC  
**ATGAGGAAGAAGCAGCTGAAGACGGAGGCAGCTCCACACTGTGAACTAA**GTAAGTAGCCC  
 Exon 1A

**B**

|                   | HRE-5                                                                                                                                 | HRE-4 | HRE-3 | HRE-2 | HRE-1 |
|-------------------|---------------------------------------------------------------------------------------------------------------------------------------|-------|-------|-------|-------|
| Homo_sapiens      | AGTTT <b>GCGTGG</b> CTCT---CCACC <b>CACGT</b> TCTGA---TGCTG <b>CACGT</b> ACCTA---ACCT <b>CACGT</b> CTCAG-----GGAGG <b>GCGTG</b> GTTTG |       |       |       |       |
| Pan_troglodytes   | AGTTTGTGTGGGTCT---CCACC <b>CACGT</b> TCTGA---TGCTG <b>CACGT</b> ACCTA---ACCT <b>CACGT</b> CTCAG-----GGAGG <b>GCGTG</b> GTTTG          |       |       |       |       |
| Pongo_pygmaeus    | AGTTTGCAGGGTCT---CCACCCATGCTCTGA---TGCTG <b>CACGT</b> ACCTA---ACCT <b>CACGT</b> CTCAG-----GGAGG <b>GCGTG</b> GTTTG                    |       |       |       |       |
| Macaca_mulatta    | AGTTT <b>GCGTGG</b> CTCT---CCACCCACGCTCTGA---TGCTG <b>CACGT</b> ACCTA---ACCT <b>CACGT</b> CTCAG-----GGAGG <b>GCGTG</b> GTTTG          |       |       |       |       |
| Mus_musculus      | GTTCTGCC-CATTTT---CCACCTTTACTTTGA---TGTGG <b>CACGT</b> AC-TG---ACCTCCCTTCTCAC-----GAAGGGTGC GGTTTG                                    |       |       |       |       |
| Rattus_norvegicus | ATTCTGCCTCACTTT---CCACCTCTGCTTTGA---TGTGG <b>CACGT</b> AC-TG---ACCTCCCGTCTCAC-----GAAGGGTGC GGTTTG                                    |       |       |       |       |
| Equus_caballus    | GGTTTGCATGGCTTT---TCAATCATACTCTGA---TGCTG <b>CACGT</b> ACCTA---GGCT <b>CACGT</b> CTCAG-----GAAGGGTGTGGTTTG                            |       |       |       |       |
| Canis_familiaris  | GGTTTGCATGGCTTT---TTACTCACACTCTGA---TGCTG <b>CACGT</b> ACCTA---AGCCTACACCTTAG-----GAGGGTGTGGCTTG                                      |       |       |       |       |
| Bos_taurus        | TCTCGGGTTTGTGTG---TTACCTATACTCTGA---CACTG <b>CACGT</b> ACCTA---ACTTTACGTTTCAG-----GAAGGGTGTGGTTTG                                     |       |       |       |       |

**Figure S1**

Promoter sequence of DMT1-1A. (A) Presence of 5 HREs (Hypoxia Responsive Element) in the promoter of DMT1. HRE consensus sequences are indicated in bold. Arrows indicate the forward or reverse position of the HREs. Gray boxes represent primers used for CHIP. +1 = transcription start site. (B) Conservation of HREs (in red) among eutherian mammals.

**A**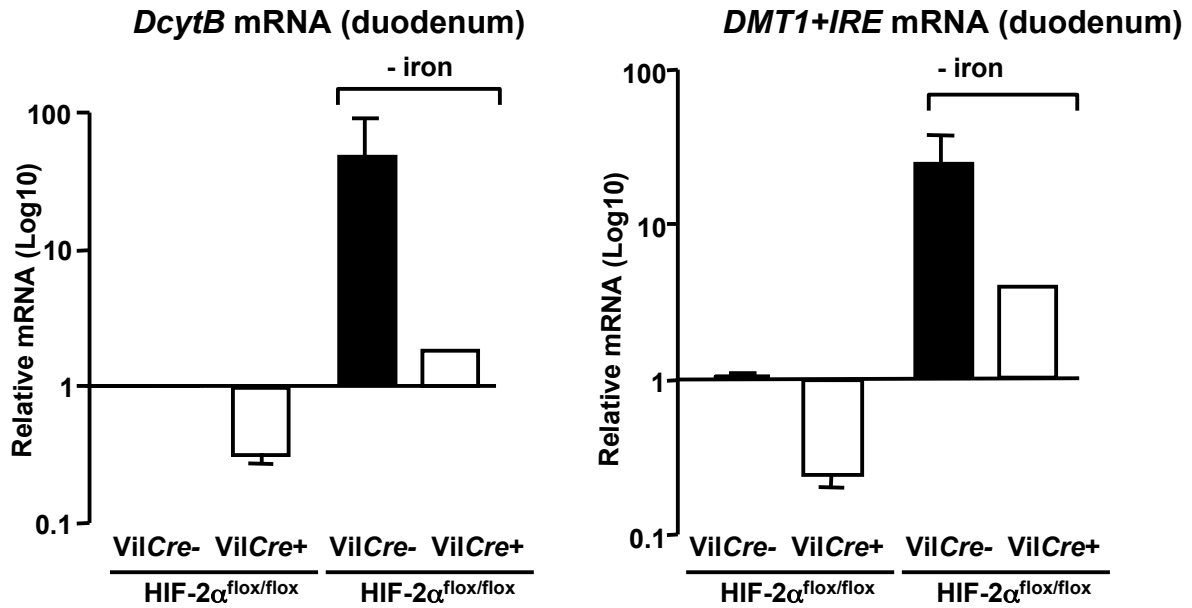**B**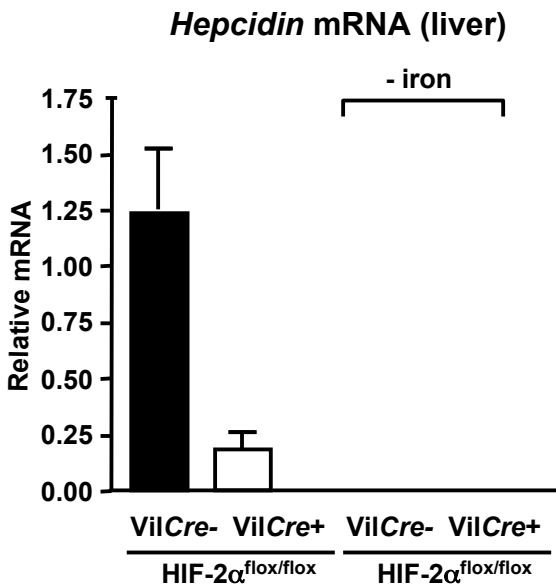**C**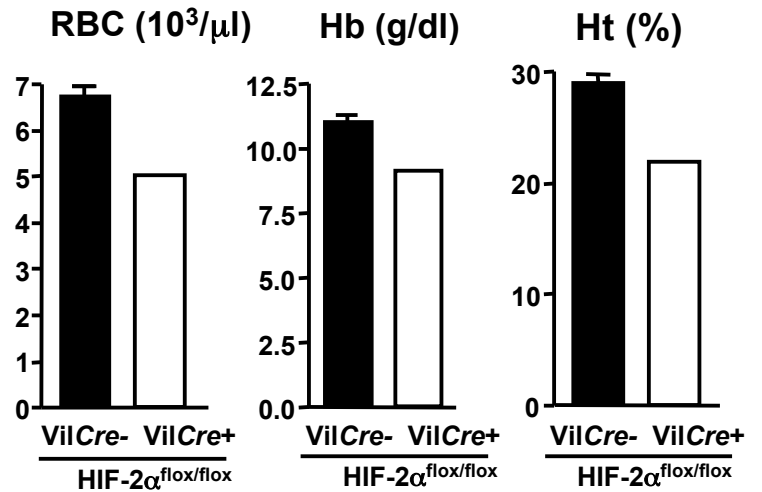**Figure S2**

(A) *DMT1+IRE* and *Dcytb* mRNA levels in duodenum scrapings from vil-cre+/HIF-1 $\alpha$ <sup>flox/flox</sup>, vil-cre+/HIF-2 $\alpha$ <sup>flox/flox</sup> mice and WT littermates under normal or 2 months iron restricted diet as determined by RT-PCR. (B) *Hepcidin* mRNA levels in liver from vil-cre+/HIF-2 $\alpha$ <sup>flox/flox</sup> mice and WT littermates under normal or 2 months iron restricted diet as determined by RT-PCR. (C) Blood parameters of vil-cre+/HIF-2 $\alpha$ <sup>flox/flox</sup> mice and WT littermates after 2 months iron restricted diet.

| Primers used in real-time PCR |                                  |                                  |
|-------------------------------|----------------------------------|----------------------------------|
| gene                          | Forward                          | Reverse                          |
| <i>HEPC1</i>                  | 5'-CCTATCTCCATCAACAGATG-3'       | 5'-AACAGATACCACACTGGGAA-3'       |
| <i>DMT1+IRE</i>               | 5'-TGTTTGATTGCATTGGGTCTG-3'      | 5'-CGCTCAGCAGGACTTTCGAG-3'       |
| <i>DMT1-IRE</i>               | 5'-TCCTGGACTGTGGACGCTC-3'        | 5'-GGTGTTTCAGAAGATAGAGTTCAGG-3'  |
| <i>DCYTB</i>                  | 5'-ACGGTTCTCATGGGAGTGAC-3'       | 5'-GAAGGCCACGCGTATTTGTA-3'       |
| <i>FN-1</i>                   | 5'-CTACCATTAGAAGGATTGACCAGCTA-3' | 5'-ACTGGAGAACCAAATGTCATAATCTG-3' |
| <i>Glut-1</i>                 | 5'-GGGCATGTGCTTCCAGTATGT-3'      | 5'-ACGAGGAGCACCGTGAAGAT-3'       |
| <i>18S</i>                    | 5'-GTAACCCGTTGAACCCATT-3'        | 5'-CCATCCAATCGGTAGTAGCG-3'       |

| Primers used for CHIP    |                             |                            |
|--------------------------|-----------------------------|----------------------------|
| name                     | Forward                     | Reverse                    |
| DMT1 (HRE)               | 5'-CTCTGATGTCTGCTCGTGGA-3'  | 5'-TGAAACCATTAACCCCAAGC-3' |
| c-Myc (negative control) | 5'-GGGCTGTGTTTAGAGGCTAGG-3' | 5'-CACCCACTCTTGAGGCAGTT-3' |

| Primers used for DMT1-1A cloning and HRE mutagenesis |                                                 |                                                 |
|------------------------------------------------------|-------------------------------------------------|-------------------------------------------------|
| name                                                 | Forward 5'-3'                                   | Reverse 5'-3'                                   |
| DMT1-1A                                              | CTAGGCTTGCCCTCGAGTTCTGTCTTGTAGTCTCTG<br>XhoI    | GGTGCAGAACAAGCTTGACTTTCCCAATGCCA<br>HindIII     |
| HRE1-DMT1                                            | GGCTTTGGAGGGCTCGAGTTGCCTCTTG<br>XhoI            | CAAGAGGCAACTCGAGCCCTCCAAAGCC<br>XhoI            |
| HRE2-DMT1                                            | TAATTGGTTTACCTCTCGAGTCAGAGGAGCAGAG<br>XhoI      | CTCTGCTCCTCTGACTCGAGAGGTGAAACCAATTA<br>XhoI     |
| HRE3-DMT1                                            | CATAATTGCCTCAGTGCTGCTCGAGCCTATATGGAAAAT<br>XhoI | ATTTTCCATATAGGCTCGAGCAGCACTGAGGCAATTATG<br>XhoI |
| HRE4-DMT1                                            | CAGCATTCCACCCTCGAGCTGAGACTCCTCA<br>XhoI         | TGAGGAGTCTCAGCTCGAGGGTGGAAATGCTG<br>XhoI        |
| HRE5-DMT1                                            | CAAGTCCGGAGTTTCTCGAGCTCTGATGTCTGC<br>XhoI       | GCAGACATCAGAGCTCGAGAACTCCGGACTTG<br>XhoI        |

**Table S1**

Primers used for real-time PCR, Chromatin Immunoprecipitation (ChIP) and cloning
